# Supplementary material for: Spatial and temporal variability of methane emissions and environmental conditions in a hyper-eutrophic fishpond
Source: Copernicus journal article supplement (doi:10.5194/bg-2023-4), 2023-01-19
Supplement: Supplementary file [file bg-2023-4-RC2-supplement.pdf]

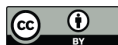

# 1 Spatial and temporal variability of methane emissions and 2 environmental conditions in a hyper-eutrophic fishpond

3 Petr Znachor<sup>1,2</sup>, Jiří Nedoma<sup>1</sup>, Vojtech Kolar<sup>1,3</sup>, Anna Matoušů<sup>1</sup>

4 <sup>1</sup>Biology Centre of Czech Academy of Sciences, v.v.i., Institute of Hydrobiology, Na Sádkách 7, České  
5 Budějovice, 37005, Czech Republic

6 <sup>2</sup>Faculty of Science, University of South Bohemia, Branišovská 1760, České Budějovice, 37005, Czech Republic

7 <sup>3</sup>Biology Centre of Czech Academy of Sciences, Institute of Entomology, Branišovská 31, České Budějovice, 370  
8 05, Czech Republic

9

10 *Correspondence to:* Anna Matoušů (anna.matousu@gmail.com)

11

12 **Abstract.** Estimations of methane (CH<sub>4</sub>) emissions are often based on point measurements using either flux  
13 chambers or a transfer coefficient method which may lead to strong underestimation of the total CH<sub>4</sub> fluxes. In  
14 order to demonstrate more precise measurements of the CH<sub>4</sub> fluxes from an aquaculture pond, using higher  
15 resolution sampling approach we examined the spatiotemporal variability of CH<sub>4</sub> concentration in the water,  
16 related fluxes (diffusive and ebullitive) and relevant environmental conditions (temperature, oxygen, chlorophyll-  
17 a) during three diurnal campaigns in a hyper-eutrophic fishpond. Our data show remarkable variance spanning  
18 several orders of magnitude while diffusive fluxes accounted for only a minor fraction of total CH<sub>4</sub> fluxes (4.1–  
19 18.5 %). Linear mixed-effects models identified water depth as the only significant predictor of CH<sub>4</sub> fluxes. Our  
20 findings necessitate complex sampling strategies involving temporal and spatial variability for reliable estimates  
21 of the role of fishponds in a global methane budget.

22

23 **Keywords:** aquaculture, emissions, fishpond, freshwater, heterogeneity, methane

24

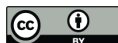

## 25 1 Introduction

26 Freshwater aquaculture ponds (fishponds) represent man-made counterparts to natural shallow lakes (Scheffer,  
27 2004) which are mainly used for fish production (mostly of common carp, *Cyprinus carpio* L.) and water retention  
28 in the landscape. Fishponds serve also as secondary biotope for various organisms (Kolar et al., 2021), supporting  
29 noteworthy animal and plant diversity (Pokorný and Hauser, 2002). However, most fishponds suffer from high  
30 fish stock densities, excessive carbon and nutrient loading from supplemental fish feeding, sewage pollution, and  
31 fertiliser runoffs from agricultural catchments or nutrient mobilisation from the anoxic sediment layers (Pechar,  
32 2000). As a result, the trophic structure of plankton communities has shifted towards a reduction of large  
33 zooplankton and massive development of phytoplankton, especially cyanobacterial blooms (Potužák et al., 2007),  
34 limiting light penetration in the water column. Rapid changes in the intensity of biological processes such as  
35 photosynthesis and respiration often result in pronounced daily or seasonal fluctuations in dissolved oxygen (Baxa  
36 et al., 2021), signalling decreasing ecosystem stability. The extent of anoxia, accumulation of organic biomass,  
37 and rapid heating of the shallow water during summer result in enhanced production of greenhouse gases (Grasset  
38 et al., 2018, Zhang et al., 2021; Bartosiewicz et al., 2021).

39 Most concerning are CH<sub>4</sub> emissions as freshwater aquaculture systems release more than 6 Tg CH<sub>4</sub> yr<sup>-1</sup> (Yuan et  
40 al., 2019). Methane can be emitted via several pathways: simple molecular diffusion, ebullition (in the form of  
41 bubbles released from oversaturated sediments), plant-mediated flux (Bastviken et al., 2004), but also through so  
42 far neglected pathways including aeration, emissions from dry/drying sediments, or dredged organic material  
43 (Kosten et al., 2020). Among all, ebullition is considered the dominant pathway (van Bergen et al., 2019; Kosten  
44 et al., 2020), which can contribute 50-96 % (Casper et al., 2000; Xiao et al., 2017; van Bergen et al., 2019; Yang  
45 et al., 2020; Zhao et al., 2021) to the total CH<sub>4</sub> flux. Along with the second important pathway – molecular  
46 diffusion, both exhibit high **spatiotemporal variability** due to various physical and biological factors acting on very  
47 short time scales, for instance, temperature (van Bergen et al., 2019), **eutrophication** (Zhang et al., 2021), **water**  
48 **depth** (DelSontro et al., 2016), **CH<sub>4</sub> production** rates (Zhou et al., 2019), CH<sub>4</sub> oxidation rates (Sanseverino et al.,  
49 2013), dissolved oxygen concentration (Xiao et al., 2017), management regime (Yang et al., 2019), or the quality  
50 of organic matter in the sediment (Schmiedeskamp et al., 2021). Recently, the direct involvement of phytoplankton  
51 in CH<sub>4</sub> production and emissions has been emphasised (Yan et al., 2019; Bižić et al., 2020; Bartosiewicz et al.,  
52 2021).



53 Although fishponds are recognised as powerful model systems for studies in ecology and evolutionary or  
54 conservation biology (De Meester et al., 2005; Céréghino et al., 2008), the extent of environmental heterogeneity  
55 in fishponds and shallow Inland small waterbodies remains poorly understood (Ortiz and Wilkinson, 2021), largely  
56 because the driving factors are either system-specific or highly variable on short time scales (Laas et al., 2012).  
57 Most of current information on lentic ecosystem structure and function comes from single-site sampling, in which  
58 measurements are taken over time at the deepest point in the lake, which does not sufficiently account for within-  
59 lake spatial variation (Stanley et al., 2019). The motivation for our study was the growing concern about the role  
60 of fishponds as important sources of CH<sub>4</sub> fluxes to the atmosphere (Wik et al., 2016). Unfortunately, the majority  
61 of global CH<sub>4</sub> flux estimates rely on upscaling methods (DelSontro et al., 2018a) based on a limited number of  
62 measurements that do not account for diurnal and seasonal variability or ecosystem spatial heterogeneity. Yang et  
63 al. (2019) indicates that a larger number of spatial replicates over a number of months is mandatory to improve  
64 the accuracy of whole-pond CH<sub>4</sub> flux estimates. The published research from other aquaculture studies have been  
65 performed mainly in tropical and subtropical zones in fish or crab aquacultures (e.g., Hu et al., 2016; Ma et al.,  
66 2018; Yang et al., 2019, 2020; Yuan et al., 2019, 2021). To better understand the spatial dynamics of CH<sub>4</sub> fluxes  
67 and environmental heterogeneity in temperate freshwater shallow lake, we conducted a spatial sampling of the  
68 hyper-eutrophic Dehtář fishpond (Czech Republic, Europe). Since the seasonal CH<sub>4</sub> production is strongly affected  
69 by temperature, we focused on warm summer months where the total CH<sub>4</sub> fluxes were expected to be the highest  
70 (Jansen et al., 2020). The objectives of our study were (i) to determine the spatial heterogeneity of CH<sub>4</sub> diffusive  
71 and total fluxes and fundamental limnological variables (oxygen, temperature, chlorophyll-a) and they change  
72 daily and monthly in the hyper-eutrophic pond, and (ii) to identify the factors that influence CH<sub>4</sub> fluxes to improve  
73 our understanding of the importance of spatiotemporal variability for global estimates of CH<sub>4</sub> efflux to the  
74 atmosphere.

## 75 **2 Material and Methods**

### 76 **2.1 Study site description**

77 The Dehtář fishpond (49° N, 14° E) is a shallow man-made lake (average and maximum depth: 2.4 and 6 m)  
78 constructed in 1479 and used for polycultural, semi-intensive production of common carp (Potužák et al., 2016).  
79 It lies in a flat agricultural landscape at 406.4 m above sea level in the upper Vltava River basin in South Bohemia  
80 (Czech Republic) which is characteristic with its network of fishponds (Fig. 1b). Due to the orography of the



81 landscape, the Dehtář fishpond, surrounded by narrow belts of littoral vegetation and adjacent to grassland and  
82 arable land, is exposed to wind, mainly from the northwest (for aerial photograph, see Suppl. Fig 1). The catchment  
83 area is 91.4 km<sup>2</sup>. The main inflow is the Dehtářský stream in the south, while several smaller tributaries flow in  
84 from the west (Fig. 1c). The fishpond has a dam 234 m long and 10 m high, with two outlets and a safety spillway.  
85 Covering 2.28 km<sup>2</sup>, the Dehtář fishpond is among the ten largest fishponds in the Czech Republic, holding a  
86 volume of  $4.71 \times 10^3$  m<sup>3</sup> and having a water residence time of 146-445 days (Potužák et al., 2016).

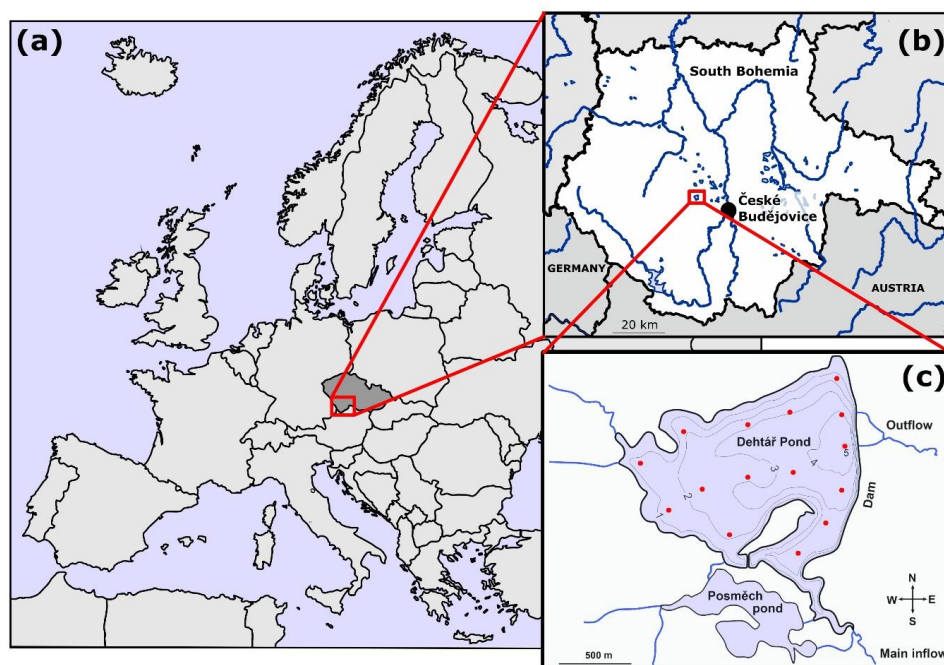

87

88 **Figure 1.** Location (a, b; copyright www.d-maps.com; [https://d-maps.com/carte.php?num\\_car=2232&lang=en](https://d-maps.com/carte.php?num_car=2232&lang=en) and [https://d-maps.com/carte.php?num\\_car=265046&lang=en](https://d-maps.com/carte.php?num_car=265046&lang=en); modified) and bathymetric map (c; credit Jiří Jarošík) of the sampled Dehtář  
89 fishpond; Blue lines indicate hydrological connections; red dots are the sampling points. Numbers indicate isobath depth.  
90

91

## 92 2.2 Sampling design and measurement

93 To measure spatial heterogeneity and temporal changes in limnological parameters and methane fluxes, we  
94 conducted three 36-hour surveys in summer 2019 (July 2-3, August 13-14, September 19-20). In the morning  
95 (between 5-6 a.m.), we first measured surface values and vertical profiles of temperature, oxygen, and chlorophyll-  
96 *a* concentration at the deepest point (see below for details). We subsequently installed 15 floating polyethylene  
97 gas chambers (as shown in Fig. 1c), serving as fixed sampling sites and at the same time for accumulation of CH<sub>4</sub>  
98 fluxes (see further), starting in the western part of the fishpond. During installation (and further during each

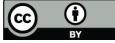

99 sampling), temperature, pH, and oxygen concentration were measured at 0.3 m depth using the WTW 330i pH  
100 meter and Oximeter (WTW, Weilheim, Germany). Vertical chlorophyll-*a* profiles were measured at each sampling  
101 site using a submersible fluorescence probe (FluoroProbe, bbe-Moldaenke, Kiehl, Germany). From each site, the  
102 average chlorophyll-*a* concentration in the surface layer (0-1 m depth) was used to assess the phytoplankton spatial  
103 heterogeneity.

104 To minimise the chance that the differences observed among sites were due to time of day, we conducted repeated  
105 measurements at the deepest point at the end of each sampling. If there was a **change, all values were corrected** for  
106 the sampling time by linear interpolation:

$$107 \quad P_{corr} = P_t + (P_{end} - P_0) \times \frac{(t-t_0)}{(t_{end}-t_0)} \quad (1)$$

108 where  $P_{corr}$  is the corrected value of a parameter,  $P_t$  is its value measured at the time  $t$ ,  $P_0$  and  $P_{end}$  are parameter  
109 values measured at the deepest point at the start (time  $t_0$ ) and at the end ( $t_{end}$ ) of the sampling. In the evening and  
110 morning of the second day (roughly at 12 h intervals), we performed additional measurements of spatial  
111 heterogeneity, allowing us to assess diurnal and nocturnal changes. In addition, samples for measuring  $CH_4$   
112 concentration in the surface water were collected at each site and analysed as described below. To assess diurnal  
113 variations in thermal structure and oxygen concentration in the water column, we made vertical profile  
114 measurements at the deepest point at 3-6 h intervals using the YSI EXO 2 multiparametric probe (YSI Inc., Yellow  
115 Springs, USA).

### 116 **2.3 Methane measurements**

117 Water samples for determining  $CH_4$  concentration in the surface water were collected at all 15 sampling sites in  
118 triplicates into 20 ml glass bottles. The bottles were capped bubble-free under water with black butyl rubber  
119 stoppers (Ochs, Germany) and sealed with aluminium crimps. Immediately after sampling, the water samples were  
120 preserved by injecting 100  $\mu$ l of concentrated sulfuric acid to stop the microbial activity (Bussmann et al., 2015).  
121 The samples were processed within one week in the laboratory using a headspace technique according to  
122 McAuliffe (1971). Methane concentration in the headspace was measured using an HP 5890 Series II gas  
123 chromatograph (Agilent Technologies, USA) and calculated with the solubility coefficient given by Yamamoto et  
124 al. (1976).

125 Methane diffusive fluxes ( $F$ ) were then calculated for each sampling site indirectly using the 2-layer model with  
126 the equation:

$$127 \quad F = k(C_{sur} - C_{eq}) \quad (2)$$



128 where  $C_{\text{sur}}$  is the  $\text{CH}_4$  concentration in surface water in  $\mu\text{mol L}^{-1}$ ,  $C_{\text{eq}}$  is the  $\text{CH}_4$  concentration in surface water in  
129 equilibrium with the atmosphere in  $\mu\text{mol L}^{-1}$ , and  $k$  is the  $\text{CH}_4$  exchange constant ( $\text{cm h}^{-1}$ ). The value of  $k$  was  
130 calculated from the local wind speed according to Crusius and Wanninkhof (2003):

$$131 \quad k = k_{600} \left( \frac{Sc}{600} \right)^n \quad (3)$$

132 where  $k_{600}$  is the gas transfer velocity for a Schmidt number ( $Sc$ ) of 600. The Schmidt number for  $\text{CH}_4$  was  
133 calculated according to Wanninkhof (2014):

$$134 \quad Sc = 1909.4 - 120.78t + 4.1555t^2 - 0.080578t^3 + 0.000658t^4 \quad (4)$$

135 where  $t$  ( $^{\circ}\text{C}$ ) is the water temperature at the time of  $\text{CH}_4$  extraction. The parameter  $C_{\text{eq}}$  in Eq. (1) was determined  
136 from the equation:

$$137 \quad C_{\text{eq}} = \beta \times p\text{CH}_4 \quad (5)$$

138 where  $\beta$  is the solubility coefficient of  $\text{CH}_4$  as a function of temperature according to Wiesenburg and Guinasso  
139 (1979), and  $p\text{CH}_4$  is the partial pressure of  $\text{CH}_4$  in the atmosphere.

140 To estimate total  $\text{CH}_4$  fluxes from the water column to the atmosphere (i.e., diffusive and ebullitive fluxes), we  
141 measured  $\text{CH}_4$  accumulation in open-bottom floating polyethylene chambers (volume 3.1 L; area 0.024  $\text{m}^2$ ). Each  
142 gas chamber was anchored at individual 15 fixed sampling sites, but allowed to float freely on the water surface.  
143 Gas was accumulating for approximately 12 h during each sampling period, i.e., during the day and night periods.  
144 Afterwards, 30 ml of gas was carefully taken from each chamber, after mixing the headspace in the chamber, and  
145 stored in evacuated Exetainers<sup>®</sup> (Labco Limited, UK). Chambers were ventilated after each sampling period to  
146 reset the incubation conditions. Methane fluxes were calculated as the difference between initial background and  
147 final concentration in the chamber headspace and expressed on the 1  $\text{m}^2$  area of the surface level per day according  
148 to Bastviken et al. (2004).

#### 149 2.4 Background limnological parameters

150 During each campaign, samples for analysis of nutrient concentration and phytoplankton composition were  
151 collected from the surface at the deepest point using a Friedinger sampler. Water transparency was measured using  
152 a Secchi desk. Total phosphorus (TP) and soluble reactive phosphorus (SRP) were analysed  
153 spectrophotometrically according to Kopáček and Hejzlar (1993) and Murphy and Riley (1962), respectively.  
154 Concentrations of  $\text{NH}_4^+$  and  $\text{NO}_3^-$  were determined according to the procedure of Kopáček and Procházková  
155 (1993) and Procházková (1959), respectively. Phytoplankton samples were preserved with Lugol's solution and

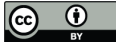

156 examined for species composition with an inverted microscope (Olympus IMT-2). Weather data were obtained  
157 from the gauging station at the fishpond dam.

## 158 **2.5 Statistical analyses**

159 Two-tailed paired Student's t-tests and Two-way ANOVA with post-hoc Tukey's multiple comparison test (Prism  
160 9.3, GraphPad Software Inc., La Jolla, USA) tested for differences between diffusive and total CH<sub>4</sub> fluxes between  
161 day and night and among three sampling campaigns, respectively. The percentage of data variability explained by  
162 different factors (daytime, month and site) was calculated with the Two-way RM ANOVA. Contour graphs  
163 illustrating changes in spatial heterogeneity of measured parameters were constructed in Surfer 10 (Golden  
164 Software, Inc., Colorado, USA) using the kriging contouring method. Spatial heterogeneity was quantified by  
165 calculating the spatial variance (i.e., coefficient of variation):

$$166 \quad CV\% = 100 \times \frac{SD}{mean} \quad (6)$$

167 Higher spatial variance indicates increasing ecosystem patchiness. Linear mixed-effects models were used to  
168 analyse the effects of O<sub>2</sub>, pH, temperature, and water depth on the CH<sub>4</sub> diffusive fluxes with the random effect of  
169 time of day nested within the effect of sampling date. The most parsimonious model was obtained by a manual  
170 backward selection, where we sequentially removed all insignificant predictors ( $p > 0.05$ ) using likelihood ratio  
171 tests implemented in the drop1 function (Zuur et al., 2009). We also compared the slopes of the month-specific  
172 regression lines produced by the model using analysis of covariance (Zar, 1984). Linear mixed-effects models  
173 were implemented in the lme4 package version 1.1-21 (Bates et al., 2015), and Kenward-Roger F-tests were  
174 computed using the ANOVA Type II function from the pbkrtest package version 0.4-7 (Halekoh and Hojsgaard,  
175 2014). The prediction of the resulting final model was visualised in the package ggeffects version 0.14.1 (Lüdtke,  
176 2018). Package performance version 0.4.4 (Lüdtke et al., 2020) was used to calculate Nakagawa's R<sup>2</sup> of the linear  
177 model. The statistical analyses were performed using R software (v. 3.5.2, R Core Team, 2018).

## 178 **3 Results**

### 179 **3.1 Weather and background fishpond characteristics**

180 Weather parameters varied among sampling campaigns. In July, clear skies prevailed with the daily air temperature  
181 above 30 °C (Table 1). During the August and September measurements, it was very cloudy, and daily air  
182 temperatures decreased to 22 and 18 °C, respectively. The water level was stable during the whole studied period



183 with a monthly fluctuation of ~ 10 cm. Water transparency was low (15-40 cm), with an increasing trend towards  
184 the end of summer (Table 1). Concentrations of total phosphorus and soluble reactive phosphorus were high (Table  
185 1), consistent with a hyper-eutrophic state of the fishpond. In contrast, nitrogen concentrations were rather low,  
186 with ammonium nitrogen being the predominant form of inorganic N in the water (Table 1).

187 **Table 1:** Basic characteristics of the Dehtář fishpond during the studied period.

|                                                           | July             | August                                   | September                 |
|-----------------------------------------------------------|------------------|------------------------------------------|---------------------------|
| <b>Weather</b>                                            | Clear sky, windy | Partly cloudy, no wind                   | Partly cloudy, no wind    |
| <b>Air temperature</b> (°C)                               | 25-32            | 20-22                                    | 11-18                     |
| <b>PHAR</b> (mol m <sup>-2</sup> day <sup>-1</sup> )      | 9.5              | 3.4                                      | 5.0                       |
| <b>Secchi depth</b> (cm)                                  | 15               | 30                                       | 40                        |
| <b>TP</b> (µg l <sup>-1</sup> )                           | 568              | 527                                      | 406                       |
| <b>SRP</b> (µg l <sup>-1</sup> )                          | 100              | 200                                      | 107                       |
| <b>N-NH<sub>4</sub><sup>+</sup></b> (µg l <sup>-1</sup> ) | 23               | 783                                      | 560                       |
| <b>N-NO<sub>3</sub><sup>-</sup></b> (µg l <sup>-1</sup> ) | 14               | 23                                       | 46                        |
| <b>Chl-<i>a</i></b> (µg l <sup>-1</sup> )                 | 456              | 156                                      | 185                       |
| <b>Phytoplankton composition</b>                          | Cyanobacteria    | Cyanobacteria, green algae, cryptophytes | Cryptophytes, green algae |

188  
189 Chlorophyll-*a* concentrations were highest in July due to the dense cyanobacterial bloom accumulated at the  
190 surface (Table 1). The phytoplankton consisted of only three cyanobacterial taxa: *Dolichospermum flos-aquae*,  
191 *Planktothrix agardhii*, and *Raphidiopsis mediteranea*. In August, phytoplankton was more diverse but also  
192 dominated by cyanobacteria: *P. agardhii*, *Aphanizomenon issatschenkoi*, and *D. flos-aquae*. In September,  
193 cyanobacteria were absent and instead, cryptophytes (*Cryptomonas reflexa*), green algae (*Pediastrum*, *Coelastrum*  
194 and *Desmodesmus*) and dinoflagellates (*Ceratium hirundinella*) prevailed.

### 195 3.2 Methane concentration and fluxes

196 The CH<sub>4</sub> concentration in surface water was highly supersaturated over the whole studied period. The obtained  
197 values varied from 0.003 up to 3.75 µmol L<sup>-1</sup> (Fig. 2), which corresponded to saturation levels of 108-12 834%. It  
198 is obvious, that the obtained data show remarkable variance: the mean (± SD) values were 0.22 ± 0.18 for July,  
199 0.34 ± 0.45 for August, and 1.61 ± 0.61 µmol L<sup>-1</sup> for September (Suppl. Fig. 11).

200



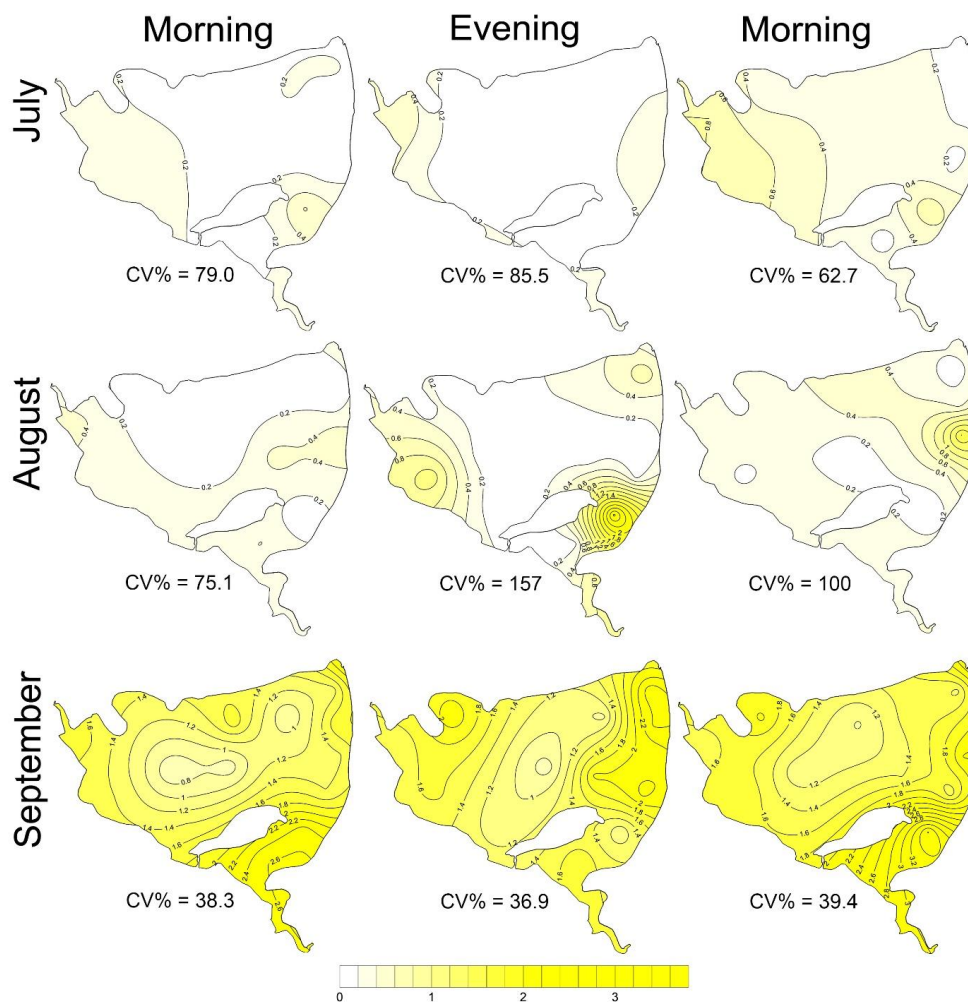

201

202 **Figure 2:** Contour graphs illustrating both seasonal and daily changes in spatial heterogeneity (indicated by the coefficient of  
203 variation, CV%) of the surface methane concentration ( $\mu\text{mol L}^{-1}$ ) in the fishpond.

204

205 Diffusive fluxes (i.e., calculated from  $\text{CH}_4$  concentration, see Eq. 2) showed the lowest values in July and August  
206 (average  $0.12$  and  $0.16 \text{ mmol m}^{-2} \text{ d}^{-1}$ , respectively) and pronouncedly peaked in September (average  $0.78 \text{ mmol}$   
207  $\text{m}^{-2} \text{ d}^{-1}$ , Fig. 3a). By contrast, in July and August, the average total  $\text{CH}_4$  fluxes (obtained with floating chambers)  
208 showed the highest values (average  $31.8 \text{ mmol m}^{-2} \text{ d}^{-1}$ ; ranging from  $0.08$  to  $152 \text{ mmol m}^{-2} \text{ d}^{-1}$ ) while in  
209 September, total  $\text{CH}_4$  fluxes were three times lower than before (average  $11.8 \text{ mmol m}^{-2} \text{ d}^{-1}$ , range  $0.3$  to  $43.5$   
210  $\text{mmol m}^{-2} \text{ d}^{-1}$ , Fig. 3b). As a result, diffusive fluxes accounted for only a minor fraction of total  $\text{CH}_4$  fluxes to the  
211 atmosphere (on average,  $9.2 \%$  in July,  $4.1 \%$  in August,  $18.5 \%$  in September, Fig. 3c).

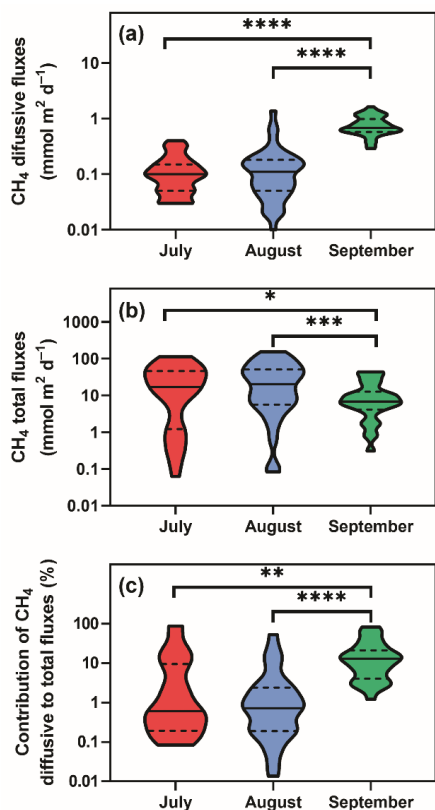

212

213 **Figure 3:** Violin plots of CH<sub>4</sub> diffusive (a) and total fluxes (b) during the studied period. Panel (c) depicts differences in the  
214 percentage contribution of diffusive to total fluxes. Solid lines are medians, while dashed lines denote quartiles. Asterisks  
215 indicate significant differences (\* p<0.05, \*\* p<0.01, \*\*\* p<0.001, \*\*\*\* p<0.0001) between sampling dates determined by  
216 two-way ANOVA with Tukey's multiple comparison test. Note that a log scale is used here for clarity.

217

218 The total CH<sub>4</sub> fluxes show spatial variability within the fishpond that range several orders of magnitude (Fig. 3, 4;  
219 Suppl. Fig. 11; Suppl. Table 1). The observed spatial pattern showed high temporal variability on both daily and  
220 monthly scales (Fig. 2, 4, Suppl. Table 1). Most of the variability in CH<sub>4</sub> diffusive fluxes was explained by  
221 sampling date (62.4 %), while for the total CH<sub>4</sub> fluxes, spatial heterogeneity accounted for 87.2 % of data  
222 variability (Table 2). Using linear mixed-effects models, we identified water depth as the only significant predictor  
223 of total CH<sub>4</sub> fluxes (Df = 1, p < 0.0001, marginal Nakagawa's R<sup>2</sup> = 0.348; Fig. 5).

224

225

226



227 **Table 2:** The percentage of data variability explained by different factors (daytime, month = sampling date, and site)  
 228 calculated with the Two-way RM ANOVA. Statistical significant values ( $p < 0.01$ ) are bold.

|                                      | % of variability |             |             |             | Significance |             |             |
|--------------------------------------|------------------|-------------|-------------|-------------|--------------|-------------|-------------|
|                                      | Daytime          | Month       | Site        | Unexplained | Daytime      | Month       | Site        |
| <b>CH<sub>4</sub> diffusive flux</b> | 2.3              | <b>62.4</b> | 13.2        | 22.1        | 0.0123       | <0.0001     | <i>n.s.</i> |
| <b>CH<sub>4</sub> total flux</b>     | 0.19             | 2.4         | <b>87.2</b> | 10.2        | <i>n.s.</i>  | <i>n.s.</i> | <0.0001     |
| <b>pH</b>                            | <b>4.4</b>       | <b>64.9</b> | 11.1        | 19.6        | 0.0001       | <0.0001     | <i>n.s.</i> |
| <b>Water temperature</b>             | <b>3.3</b>       | <b>92.3</b> | <b>2.5</b>  | 1.9         | <0.0001      | <0.0001     | <0.0001     |
| <b>O<sub>2</sub></b>                 | <b>21.7</b>      | <b>48.1</b> | <b>13.8</b> | 16.4        | <0.0001      | <0.0001     | 0.0135      |
| <b>Chl-<i>a</i></b>                  | 0.019            | <b>74.9</b> | <b>16.7</b> | 8.4         | <i>n.s.</i>  | <0.0001     | <0.0001     |

229 Interestingly, slopes of the linear regressions differed significantly among individual sampling campaigns (Fig. 5),  
 230 indicating an additional season-related factor that affects CH<sub>4</sub> fluxes in the fishpond. Calculated CH<sub>4</sub> diffusive  
 231 fluxes were not correlated with total fluxes. Linear mixed-effects models did not identify any significant predictor  
 232 of the fluxes, indicating that factors and processes out of the study's scope are involved. We found no significant  
 233 difference in either diffusive or total CH<sub>4</sub> fluxes between day and night.

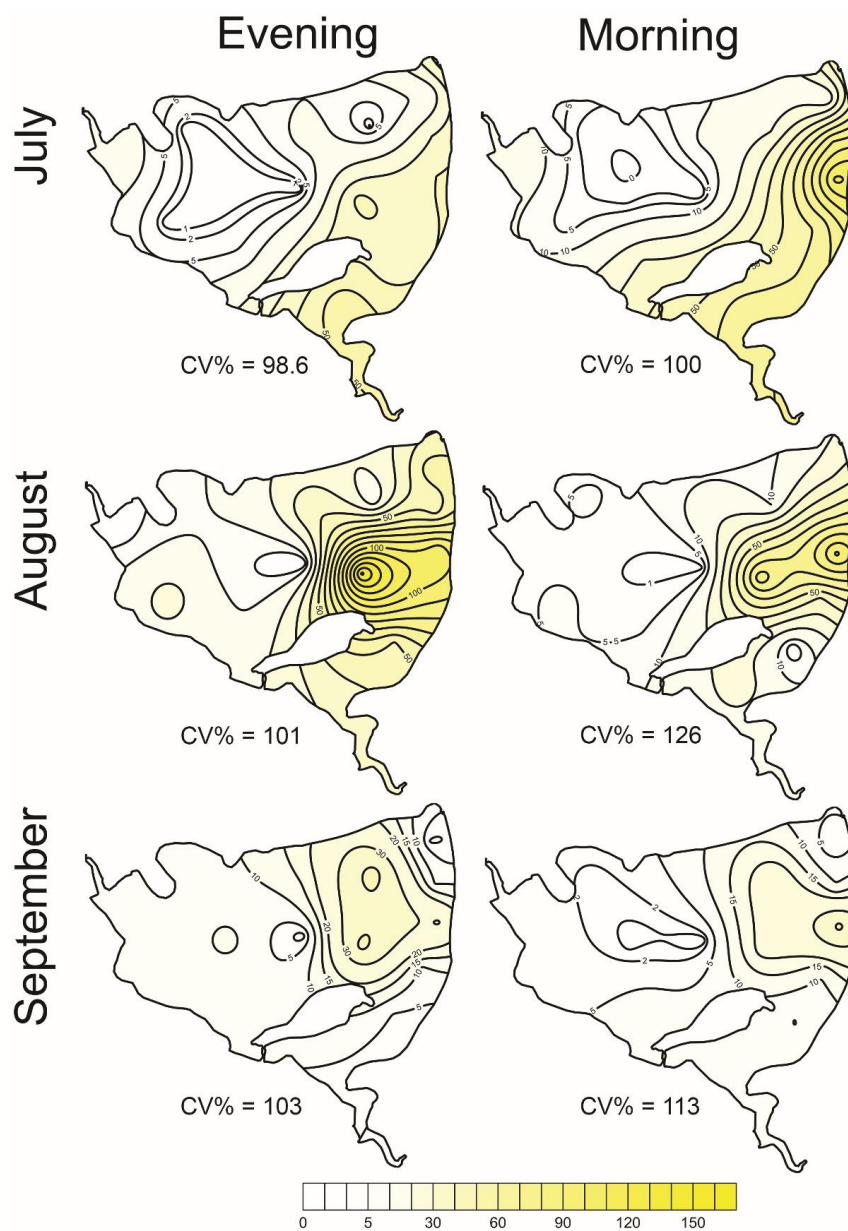

234

235 **Figure 4:** Contour graphs of methane total fluxes in the Dehtár fishpond. Isopleths connect sites with the same value of  
236 methane fluxes ( $\text{mmol m}^{-2} \text{day}^{-1}$ ). CV% is a measure of spatial heterogeneity.

237

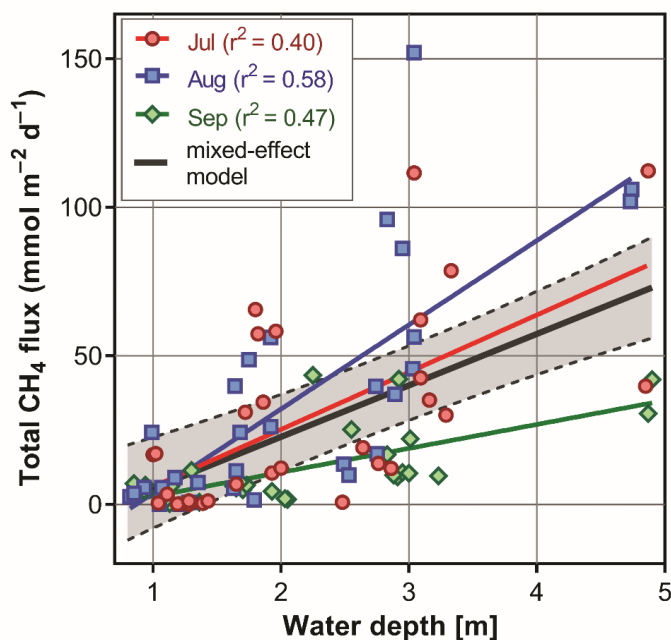

238

239 **Figure 5:** The most parsimonious linear mixed-effect model of methane total fluxes showing the water depth as the only  
240 significant predictor. Symbols are the measured values, the solid black line is the prediction, and dashed lines are 95th  
241 confidence intervals. Colours indicate month specific relation between total methane fluxes and water depth. Differences in  
242 slopes were tested using the F-test. In September, the slope of the regression line was significantly different from that in July  
243 and August.

### 244 3.3 Diurnal changes in vertical profiles of oxygen and temperature

245 Several contrasting patterns of vertical temperature and oxygen profiles occurred during summer 2019. Diurnal  
246 changes were most pronounced in July (Fig. 6). Surface temperatures varied from 25 °C in the morning to nearly  
247 30 °C in the afternoon. Thermal stratification of the water column was weak in the morning but became strongest  
248 at 14:30 with a thermocline at 0.5 m depth (Fig. 6). Later in the afternoon, the water column began to be mixed by  
249 wind. The morning vertical oxygen profile was characterised by a surface value of 4.3 mg L<sup>-1</sup>, corresponding to  
250 51 % saturation and anoxia below 3 m.

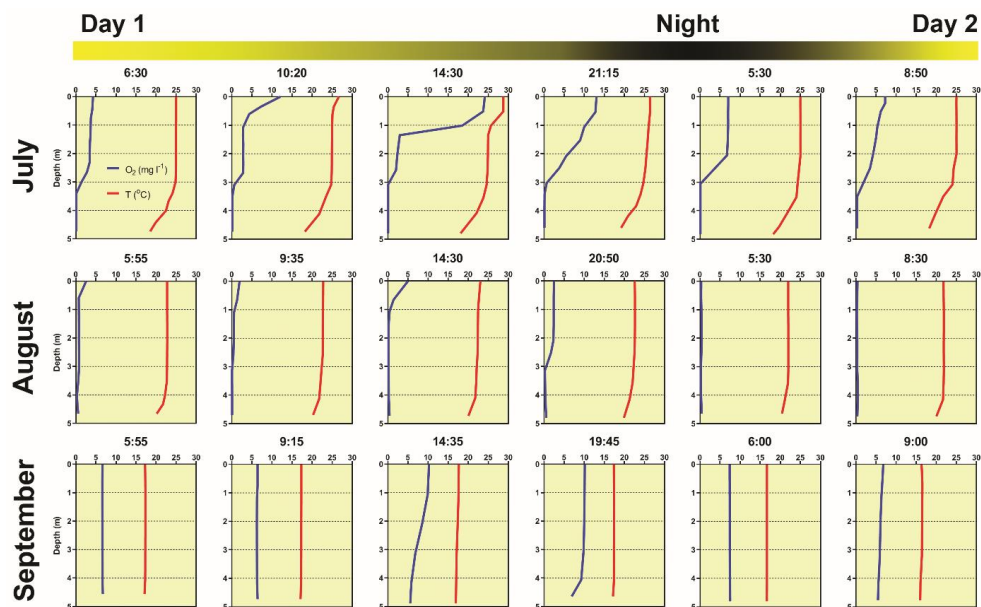

251

252 **Figure 6:** Diurnal changes in vertical profiles of temperature and oxygen concentration measured at the deepest point of the  
253 fishpond. Numbers above each graph indicate the time of measurement.

254 Due to the high photosynthetic activity of cyanobacteria, the surface oxygen concentration increased to  $24 \text{ mg L}^{-1}$   
255 ( $320 \%$  saturation, Fig. 6), and a steep oxycline was established at a depth of 0.5-1.5 m with no effect on the  
256 anoxic conditions at the deeper layers. Wind action eroded both the oxy- and thermoclines in the evening, and by  
257 the next morning, the vertical profiles were similar to those at the beginning.

258 In August, the water column was almost entirely mixed and low in oxygen in the morning, with only  $2.6 \text{ mg L}^{-1}$   
259 ( $30 \%$  saturation) of oxygen at the surface. Due to cloudy weather, the daily photosynthetic activity of  
260 phytoplankton resulted in only a slight increase in oxygen concentration at 0-1.5 m depth ( $4 \text{ mg L}^{-1}$ ,  $47 \%$   
261 saturation). By the morning of the next day, the entire water column turned very close to anoxic ( $0.4 \text{ mg L}^{-1}$ ,  $4 \%$   
262 saturation; Fig. 6), which in turn affected the spatial distribution of zooplankton, as evidenced by the formation of  
263 dense zooplankton clouds accumulated in the thin layer just at the surface (see Suppl. Fig. 3). In September, the  
264 water column was completely mixed, and we observed only weak daily changes in thermal and oxygen vertical  
265 structures (Fig. 6).

#### 266 **3.4 Effect of wind on spatial heterogeneity of temperature, oxygen and chlorophyll-*a***

267 During the summer, all measured parameters showed remarkable within-lake spatial heterogeneity (Suppl. Fig. 4-  
268 8). In July, meteorological conditions allowed for demonstrating the effect of wind on fishpond spatial





269 heterogeneity. In the morning, there were no substantial differences in the surface temperature and oxygen  
270 concentrations (Fig. 7ab). Phytoplankton biomass was accumulated mostly in the shallow western part, with the  
271 maximum in the centre (Fig. 6c). At 14:00, a light breeze started to blow from the northwest, achieving a maximum  
272 of  $11 \text{ km h}^{-1}$  (Suppl. Fig. 7). This episode lasted till the evening measurement, and the wind ceased by 21:00. The  
273 wind was strong enough to change spatial distribution substantially (Fig. 7d-f, Suppl. Fig. 4). In the evening, the  
274 surface water temperature on the windward (south) side of the fishpond was  $\sim 4 \text{ }^\circ\text{C}$  higher than in the north (Fig.  
275 7d). The wind also induced order of magnitude differences in oxygen concentration along the north-south axis of  
276 the fishpond ( $3 \text{ mg L}^{-1}$  of  $\text{O}_2$  at the north,  $24 \text{ mg L}^{-1}$  of  $\text{O}_2$  at the south; Fig. 7e) and affected phytoplankton  
277 distribution in the fishpond, resulting in remarkable bloom accumulation in the south (Fig. 7f, Suppl. Fig. 8).  
278 During the calm night after the disturbance, the north-south gradient substantially weakened. In August and  
279 September, the thermal heterogeneity of the pond was rather low, but the spatial distribution of oxygen and  
280 chlorophyll-*a* remained highly variable (Suppl. Fig. 5–8, Suppl. Table 1).

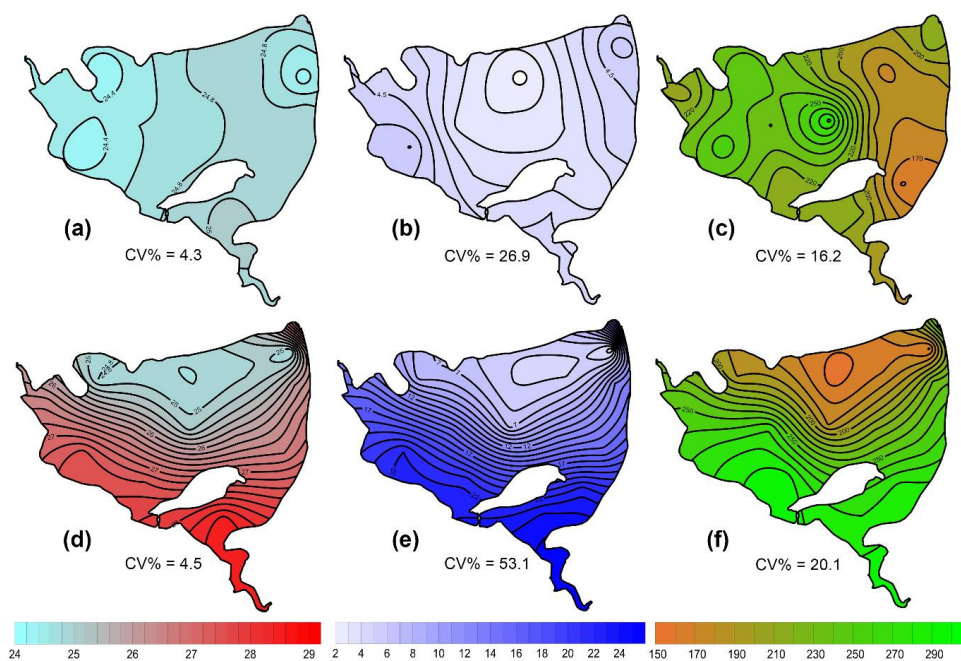

281

282 **Figure 7:** Contour graphs of surface temperature (a, d;  $^\circ\text{C}$ ), oxygen concentration (b, e;  $\text{mg L}^{-1}$ ) and chlorophyll-*a*  
283 concentration (c, f;  $\mu\text{g L}^{-1}$ ) measured on July 2 at different times of day: a, b and c are the morning measurements; d, e and f  
284 are evening measurements following a wind disturbance. Coefficient of variation (CV %) is a measure of spatial heterogeneity  
285 of measured parameters.



286 **Discussion**

287 **4.1 Methane fluxes**

288 Assessing spatial heterogeneity of the CH<sub>4</sub> fluxes within a fishpond is critical for a reliable estimate of its  
289 contribution to the global CH<sub>4</sub> budget. In our study, the variability in total CH<sub>4</sub> fluxes spanned **several orders** of  
290 magnitude (ranging from 0.06 up to 1 121.3 mmol m<sup>-2</sup> d<sup>-1</sup>), which is in agreement with similar studies (Casper et  
291 al., 2000; DelSontro et al., 2016; Natchimutu et al., 2016). However, most system-specific CH<sub>4</sub> flux estimates rely  
292 on upscaling from a limited number of sites (Bastviken et al., 2004; Rasilo et al., 2015; Wik et al., 2016) because  
293 obtaining spatial variability in CH<sub>4</sub> emission is methodologically challenging. In general, spatial heterogeneity  
294 may reflect differences in water sources, physical mixing, local transformations and biogeochemical processes and  
295 rates among lake habitats (Loken et al., 2019). In deep lakes, littoral areas can contribute disproportionately to  
296 total lake CH<sub>4</sub> fluxes (Hofmann et al., 2010; Hofmann 2013, Natchimuthu et al., 2016; Schilder et al., 2013) and  
297 are often missed by traditional sampling approaches (Wik et al., 2016). According to Wik et al. (2016), low  
298 temporal and spatial resolutions are unlikely to cause overestimates. On the other hand, DelSontro et al. (2018b)  
299 suggested that horizontal transport of CH<sub>4</sub> produced in littoral zones and the interaction between physical and  
300 biological processes (e.g. air-water gas exchange, water column mixing, the interplay between CH<sub>4</sub> production  
301 and microbial oxidation) may result in an underestimation of whole-lake CH<sub>4</sub> fluxes based on centre samples.  
302 Similarly, Natchimuthu et al. (2016) found that up to 78 % underestimation would occur if samples obtained only  
303 from the lake center are used to extrapolate the total CH<sub>4</sub> flux. However, extrapolating our data from the deepest  
304 point of the Dehtář fishpond would lead to an overestimation **of the CH<sub>4</sub> fluxes by a factor of 2.9** (Suppl. Fig. 12).  
305 The bias introduced by the deepest point measurement appears to be highly variable among systems with different  
306 morphology, geographical location, mixing regimes or trophic states. For instance, analysis of 22 European lakes  
307 during late summer has shown that spatially resolved CH<sub>4</sub> diffusive fluxes were highly variable for individual  
308 lakes, yielding 55–300 % differences in the whole-lake estimates (Schilder et al., 2013). Schmiedeskamp et al.  
309 (2021) observed an increase in CH<sub>4</sub> fluxes from the shore towards the centre in response to increasing sediment  
310 C-content in two shallow German lakes. In line with these findings, our results provide further evidence that  
311 spatially resolved data are needed to validate the uncertainties that come from using single-point samples to  
312 represent whole-lake processes in hyper-eutrophic systems. As stated by Loken et al. (2019), rather than assuming  
313 spatial homogeneity, scaling-up exercises of global carbon budgets should acknowledge the uncertainty that comes  
314 from extrapolating from spatially limited data sets.





315 In the Dehtář fishpond, the total CH<sub>4</sub> fluxes increased with water depth, and this relationship was month specific.  
316 The highest CH<sub>4</sub> fluxes at the deepest points may seem contradictory to previous studies, in which the highest  
317 fluxes were typically observed in littoral areas (e.g. DelSontro et al., 2018b; Hofman et al., 2010; Natchimuthu et  
318 al., 2016; Schilder et al., 2013). However, these findings are based on studying mostly lakes whose morphology,  
319 trophic state or oxygen regime sharply contrast with the Dehtář fishpond, where the upper two meters of the water  
320 column were oxygen-saturated while the deepest strata were mostly anoxic. In such hyper-eutrophic systems, high  
321 nutrient loading increases autochthonous primary production (Potužák et al., 2007; Rutegwa et al., 2019) and  
322 promotes oxygen consumption and anaerobic decomposition in the sediments (Baxa et al., 2020), leading to  
323 enhanced CH<sub>4</sub> production (Bastviken et al., 2004; Grasset et al., 2018). In aquaculture ponds in Southeast China,  
324 CH<sub>4</sub> fluxes exhibited considerable spatial variations and peaked in the relatively deep feeding zone, where the  
325 large loads of sediment organic matter fueled CH<sub>4</sub> production (Yang et al., 2020). Furthermore, sediment  
326 temperature was the strongest predictor of CH<sub>4</sub> fluxes in ponds (DelSontro et al., 2016; Yang et al., 2020). It is,  
327 therefore, reasonable to assume that both temperature and oxygen concentration in the sediment likely contributed  
328 to changes in observed CH<sub>4</sub> fluxes during the studied period in our study. Although both parameters were not  
329 directly measured in the sediment, it can be deduced from their vertical profiles that the probability of sediment  
330 anoxia was highest in August and lowest in September, and the sediment temperature was lowest in September  
331 (see Fig. 5).

332 Our results agree with the generally accepted view that processes other than diffusive fluxes – most likely  
333 ebullition – represent the major CH<sub>4</sub> pathway to the atmosphere in hyper-eutrophic ponds (Kosten et al., 2020).  
334 Although freshwaters with high primary production are more likely to have high CH<sub>4</sub> ebullition rates (DelSontro  
335 et al., 2016), the dominant role of ebullition was also found across lentic systems differing in size, trophic status  
336 or geographical location (Aben et al., 2017). Ebullition accounted on average for 56 % of total CH<sub>4</sub> fluxes in  
337 northern ponds in Canada (DelSontro et al., 2016), 49 and 71 % in two different zones of Lake Taihu (Xiao et al.,  
338 2017) and 48-83 % in three Swedish lakes (Natchimuthu et al., 2016; Jansen et al., 2019). The highest contribution  
339 was found in the small hyper-eutrophic Priest Pot (UK), where ebullition represented 96 % of the total CH<sub>4</sub> flux  
340 from the pond (Casper et al., 2000). Apparently, the contribution of ebullition can vary among systems and will  
341 remain uncertain until measurement designs cover enough spatiotemporal variability to yield representative values  
342 for the whole ecosystem.

343 In shallow water bodies, a semi-stable flux of microbubbles was suggested to account for a significant portion of  
344 the total CH<sub>4</sub> flux (Prairie and del Giorgio, 2013). When CH<sub>4</sub> concentration in the water column is above a certain



345 threshold of microbubble density, these microbubbles likely aggregate, fuse, and escape to the atmosphere from  
346 buoyancy (Prairie and del Giorgio, 2013). Even a small fluctuation in hydrostatic pressure (e.g., due to changes in  
347 atmospheric pressure) or lake water level was shown to trigger enhanced CH<sub>4</sub> ebullition (Bastviken et al., 2004;  
348 Casper et al., 2000; Varadharajan and Hemond, 2012). Since ebullition rates increase exponentially with  
349 temperature, CH<sub>4</sub> fluxes tend to peak in warm summer months (van Bergen et al., 2019). In our study, 1 % lower  
350 air pressure in July and August than in September, along with bottom anoxia and higher water temperature, could  
351 account for the enhanced release of CH<sub>4</sub> bubbles from the sediment (31.7 mmol m<sup>-2</sup>d<sup>-1</sup>, >90 % of total CH<sub>4</sub> fluxes;  
352 Suppl. Fig. 2). In September, when we observed the lowest water temperatures from the studied period and the  
353 oxygen profile was rather uniform, ebullition accounted for 81 % (11 mmol m<sup>-2</sup>d<sup>-1</sup>) of the total CH<sub>4</sub> fluxes. The  
354 spatially pooled data of the total CH<sub>4</sub> fluxes measured in the Dehtář fishpond varied from 11.8 to 34.5 mmol m<sup>-2</sup>  
355 d<sup>-1</sup>, which is comparable with similar systems elsewhere (e.g., Bastviken et al., 2010; van Bergen et al., 2019;  
356 Baron et al., 2022). To sum up, both diffusive fluxes and ebullition must be addressed to understand the magnitude  
357 of total aquatic CH<sub>4</sub> fluxes and how their relative contributions vary across and within aquatic systems (Kosten et  
358 al., 2020). Moreover, with an improved determination of CH<sub>4</sub> hot-spots and its causes, the management of ponds  
359 could be changed accordingly and so the overall emissions reduced for example by decreasing P-availability and  
360 dredging (Nijman et al., 2022).

#### 361 **4.2 Effect of wind event on ecosystem spatial structure**

362 Sudden changes in ecosystem spatial structure in response to meteorological forcing have rarely been documented  
363 (Loken et al., 2019) since they are hard to predict. Research into them using traditional methods requires intensive  
364 effort or expensive instrumentation (Ortiz and Wilkinson, 2021), and it remains a matter of luck to obtain a relevant  
365 dataset. In the July sampling campaign, we observed a strong impact of the wind on environmental heterogeneity  
366 in the fishpond, which was apparent at a sub-daily time scale. Due to the methodological constraints, i.e., lack of  
367 initial measurement, we can only speculate about the effect of wind on the total CH<sub>4</sub> fluxes. The northwest wind  
368 during the day advected warmed surface water with cyanobacterial bloom from the north basin to the south. In the  
369 evening, it resulted in bloom accumulation on the upward side and a north-south gradient of more than 4 °C and  
370 4-24 mg L<sup>-1</sup> oxygen. After the winds fell off, the observed gradients declined during cooling at night. We assume  
371 that the wind blowing across the pond surface drove buoyant cyanobacteria and surface water downwind and  
372 caused an upwelling of deeper, colder, and hypoxic water on the upwind side. This wind-related circulation pattern  
373 has been described as a “conveyer belt” in classical textbooks (Reynolds et al., 2006), held responsible for a  
374 disruption of the thermal structure of the water column and the non-uniform spatial distribution of pH, oxygen,



375 CO<sub>2</sub> or CH<sub>4</sub> and also plankton assemblages (e.g. Loken et al., 2019; Natchimuthu et al., 2016; Rinke et al., 2009;  
376 Ortiz and Wilkinson, 2021).

377 Similar to our study, mild winds (~4 m s<sup>-1</sup>) were strong enough to redistribute heat and induce lake-wide  
378 circulations driving upwelling and downwelling in 24 m deep Lake Pleasant (Czikowsky et al., 2018). As the wind  
379 blows harder and lasts longer, the effects on ecosystem functioning may target higher trophic levels and become  
380 more complex (Rinke et al., 2009). In Lake Constance, a three day storm event with wind velocities of ~10 m s<sup>-1</sup>  
381 resulted in a lake-wide displacement of water masses and the formation of the 6-15 °C horizontal surface water  
382 gradient, which in turn changed the spatial distribution of phytoplankton, zooplankton and juvenile fish (Rinke et  
383 al., 2009). After several stormy days (wind velocities of 12-15 m s<sup>-1</sup>), Čech et al. (2011) observed negative effects  
384 of wind-driven changes in water temperature and wave action on perch (*Perca fluviatilis*) spawning in the Lake  
385 Milada. Although wind events affect shallow and deep lakes differently, there is growing evidence that they can  
386 have far-reaching consequences on the functioning of aquatic ecosystems by disrupting energy flows, nutrient  
387 fluxes, productivity and reproduction, and consequently altering community composition and trophic interactions  
388 in the short and long term (Stockwell et al., 2020). As the frequency, intensity, spatial extent and duration of these  
389 extreme meteorological events are projected to increase due to ongoing climate change (Comou and Rahmstorf,  
390 2012), there is an urgent need to better understand the mechanisms underlying their impacts on the maintenance  
391 of the ecosystem services.

#### 392 **4.3 Summer changes in the oxygen regime**

393 Our data demonstrate that shallow, hyper-eutrophic ponds have disrupted oxygen regimes (Baxa et al., 2021) with  
394 anoxic hypolimnion and may experience severe whole-water column hypoxia critical for aquatic biota (Miranda  
395 et al., 2001). The hypoxic periods may result, for example, from sudden weather change (Jeppesen et al., 1990)  
396 and last several days, during which physical processes and phytoplankton photosynthesis cannot compensate for  
397 intense community respiration (Baxa et al., 2021). This became obvious in August when severe oxygen depletion  
398 was measured at the surface across the whole pond, mostly far below a critical level of 4.5 mg L<sup>-1</sup>, when adverse  
399 effects came into play (Banerjee et al., 2019). However, oxygen surface concentrations in shallow parts of the  
400 pond were substantially higher regardless of the time of day, which contrasts with findings of Miranda et al. (2001),  
401 who emphasised shallow waters as the most sensitive parts of lakes, where hypoxic events can occur due to the  
402 respiration of sediment biota. The observed spatial gradients of oxygen may create temporal refugia which allow  
403 fish to survive harsh conditions that occur in the deepest part of the pond. To minimise economic losses and  
404 negative impacts on the ecosystem, future research should identify the interplay between meteorological forcing,

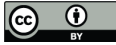

405 trophic status and anthropogenic pressures (e.g. management practices) that affect oxygen fluctuations at various  
406 time scales.

#### 407 **4.4 Study limitations**

408 Like in other research, there are some limitations in the current study. Since our measurement had only a limited  
409 temporal resolution (three samplings during the summer season), it is not appropriate to extrapolate CH<sub>4</sub> emissions  
410 for annual values. Noticeably, future research must increase the frequency of the sampling and include also  
411 innovative techniques to measure CH<sub>4</sub> fluxes at multiple fishponds, with different management regime. In our  
412 study, the 12 h deployment time of the floating chambers could have led to extensive gas accumulation, which in  
413 turn might have resulted in an underestimation of the total CH<sub>4</sub> fluxes due to the dissolution of the CH<sub>4</sub> from the  
414 chamber into the water once the equilibrium concentration in the chamber is overcome (Bastviken et al., 2010).  
415 However, CH<sub>4</sub> concentrations in water corresponded to a supersaturation of several orders of magnitude, so the  
416 introduced bias appears to be of minor importance. In any case, our daily CH<sub>4</sub> fluxes represent a rather conservative  
417 estimate for the global methane budget. In our study, we also did not address the important processes that could  
418 shed light on the lake CH<sub>4</sub> budget, such as CH<sub>4</sub> oxidation rates (Bastviken et al., 2008) or biological interaction  
419 (e.g. protistan grazing on CH<sub>4</sub> oxidising bacteria) in aquatic food webs (Sanseverino et al., 2012) that can affect  
420 the overall CH<sub>4</sub> fluxes. We also lack information about spatial differences in sediment microbiota and organic  
421 carbon content and compositions, which were found to affect CH<sub>4</sub> production rates (Berberich et al., 2020;  
422 Emerson et al., 2021). Despite the limitation mentioned above, our results show that complementary spatial  
423 surveys help contextualise the fixed station dynamics and provide additional, management-relevant information  
424 about the fishpond.

#### 425 **5. Conclusions**

426 Deciphering the mechanisms that drive spatial and temporal heterogeneity in aquatic ecosystem structure and  
427 function not only expands our understanding of pond ecology but also provides insights to improve the  
428 management of these ecosystems and the services they provide. Our results suggest that spatial heterogeneity needs  
429 to be considered when designing experiments and monitoring programs. Without the spatially resolved sampling,  
430 we introduce bias into our datasets, hampering our limnological understanding of the ecosystem's functioning and  
431 impeding our ability to accurately estimate rates such as methane emissions on a global scale (DelSontro et al.,  
432 2018a). In agreement with Kosten et al. (2020), we demonstrated that neglecting ebullition leads to a considerable  
433 underestimating of the total CH<sub>4</sub> fluxes. Since there are thousands of these intensively managed fishponds, we



434 argue for changing the management practices toward sustainable use of natural resources to mitigate the overall  
435 emissions of greenhouse gases from these ecosystems. Future studies are needed to characterise CH<sub>4</sub> fluxes over  
436 a greater number and diversity of aquaculture ponds and examine the mechanisms controlling CH<sub>4</sub> emissions in  
437 aquatic ecosystems.

#### 438 **Acknowledgements**

439 The study was supported by the Czech Science Foundation (Research Projects No. 17-09310S, 19-23261S and  
440 P504/19-16554S). We thank Dr. Martin Rulík for providing us gas chambers. We especially thank to Prof.  
441 Miloslav Šimek and Linda Jiřová for enabling gas analyses. We are grateful Anna Sieczko for consultation on the  
442 calculation of CH<sub>4</sub> fluxes. English correction was made by Anton Baer.

#### 443 **Data availability**

444 Dataset associated with the manuscript can be found in the GitHub Repositories under  
445 <https://zenodo.org/badge/latestdoi/587640213>.

#### 446 **Author contributions**

447 All authors contributed to the study conception and design. PZ planned the campaign; PZ, AM and JN performed  
448 the sampling and analyzed the data; AM performed the gas-measurements; VK performed statistical analyses and  
449 modelling; PZ and AM wrote the manuscript. All authors read and approved the final manuscript.

#### 450 **References**

- 451 Aben, R.C.H., Barros, N., van Donk, E., Frenken, T., Hilt, S., Kazanjian, G., Lamers, L.P.M., Peeters, E.T.H.M.,  
452 Roelofs, J.G. M, de Senerpont Domis, L.N., Stephan, S., Velthuis, M., Van de Waal, D.B., Wik, M., Thornton,  
453 B.F., Wilkinson, J., DelSontro, T., and Kosten, S.: Cross continental increase in methane ebullition under climate  
454 change. *Nat. Commun.*, 8, 1682, <https://doi.org/10.1038/s41467-017-01535-y>, 2017.
- 455 Banerjee, A., Chakrabarty, M., Rakshit, N., Bhowmick, A.R., and Ray, S.: Environmental factors as indicators of  
456 dissolved oxygen concentration and zooplankton abundance: deep learning versus traditional regression approach.  
457 *Ecol. Indic.*, 100, 99-117, <https://doi.org/10.1016/j.ecolind.2018.09.051>, 2019.
- 458 Baron, A.A.P., Dyck, L.T., Amjad, H., Bragg, J., Kroft, E., Newson, J., Oleson, K., Casson, N.J., North, R.L.,  
459 Venkiteswaran, J.J., and Whitfield, C.J.: Differences in ebullitive methane release from small, shallow ponds  
460 present challenges for scaling. *Sci. Total Environ.*, 802, 149685, <https://doi.org/10.1016/j.scitotenv.2021.149685>,  
461 2022.

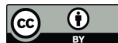

- 462 Bartosiewicz, M., Maranger, R., Przytulska, A., and Laurion, I.: Effects of phytoplankton blooms on fluxes and  
463 emissions of greenhouse gases in a eutrophic lake. *Water Res.*, 196, 116985,  
464 <https://doi.org/10.1016/j.watres.2021.116985>, 2021.
- 465 Bastviken, D., Cole, J., Pace M., and Tranvik, L.: Methane emissions from lakes: Dependence of lake  
466 characteristics, two regional assessments, and a global estimate. *Global Biogeochem. Cycles*, 18, GB4009,  
467 <https://doi.org/10.1029/2004GB002238>, 2004.
- 468 Bastviken, D., Cole, J.J., Pace, M.L., and Van de Bogert, M.C.: Fates of methane from different lake habitats:  
469 connecting whole-lake budgets and CH<sub>4</sub> emissions. *J. Geophys. Res. Biogeosci.*, 113, G02024,  
470 <https://doi.org/10.1029/2007JG000608>, 2008.
- 471 Bastviken, D., Santoro, A.L., Marotta, H., Pinho, L.Q., Calheiros, D.F., Crill, P., and Enrich-Prast, A.: Methane  
472 Emissions from Pantanal, South America, during the Low Water Season: Toward More Comprehensive Sampling.  
473 *Environ. Sci. Tech.*, 44, 5450-5455, <https://doi.org/10.1021/es1005048>, 2010.
- 474 Bates, D., Maechler, M., Bolker, B., and Walker, S.: Fitting Linear Mixed-Effects Models Using lme4. *J. Stat.*  
475 *Soft.*, 67, 1-48, <https://doi.org/10.18637/jss.v067.i01>, 2015.
- 476 Baxa, M., Musil, M., Kummel, M., Hazlík, O., Tesařová, B., and Pechar, L.: Dissolved oxygen deficits in a shallow  
477 eutrophic aquatic ecosystem (fishpond) – Sediment oxygen demand and water column respiration alternately drive  
478 the oxygen regime. *Sci. Total Environ.*, 766, 142647, <https://doi.org/10.1016/j.scitotenv.2020.142647>, 2021.
- 479 Beaulieu, J.J., DelSontro, T., and Downing, J.A.: Eutrophication will increase methane emissions from lakes and  
480 impoundments during the 21<sup>st</sup> century. *Nat. Commun.*, 10, 3-7, <https://doi.org/10.1038/s41467-019-09100-5>,  
481 2019.
- 482 Berberich, M.E., Beaulieu, J.J., Hamilton, T.L., Waldo, S., and Buffam, I.: Spatial variability of sediment methane  
483 production and methanogen communities within a eutrophic reservoir: Importance of organic matter source and  
484 quantity. *Limnol. Oceanogr.*, 65, 1336-1358, <https://doi.org/10.1002/lno.11392>, 2020.
- 485 Bižić, M., Klintzsch, T., Ionescu, D., Hindiyeh, M.Y., Günthel, M., Muro-Pastor, A.M., Eckert, W., Urich, T.,  
486 Keppler, F., and Grossart, H.P.: Aquatic and terrestrial cyanobacteria produce methane. *Sci. Adv.*, 6, 1-10,  
487 <https://doi.org/10.1126/sciadv.aax5343>, 2020.
- 488 Bussmann, I., Matoušů, A., Osudar, R., and Mau, S.: Assessment of the radio <sup>3</sup>H-CH<sub>4</sub> tracer technique to measure  
489 aerobic methane oxidation in the water column. *Limnol. Oceanogr.- Meth.*, 13, 312-327,  
490 <https://doi.org/10.1002/lom3.10027>, 2015.
- 491 Casper, P., Maberly, S.C., Hall, G.H., and Finlay, B.J.: Fluxes of methane and carbon dioxide from a small  
492 productive lake to the atmosphere. *Biogeochemistry*, 49, 1-19, <https://doi.org/10.1023/A:1006269900174>, 2000.
- 493 Čech, M., Peterka, J., Říha, M., Muška, M., Hejzlar, J., and Kubečka, J.: Location and timing of the deposition of  
494 eggs strands by perch (*Perca fluviatilis* L.): the roles of lake hydrology, spawning substrate and female size.  
495 *Knowl. Manag. Aquat. Ecosyst.*, 403, 1-12, <https://doi.org/10.1051/kmae/2011070>, 2011.
- 496 Céréghino, R., Biggs, J., Oertli, B., and Declerck, S.: The ecology of European ponds: defining the characteristics  
497 of a neglected freshwater habitat. *Hydrobiologia*, 597, 1-6, <https://doi.org/10.1007/s10750-007-9225-8>, 2008.
- 498 Coumou, D. and Rahmstorf, S.: A decade of weather extreme. *Nat. Clim. Change*, 2, 491-96,  
499 <https://doi.org/10.1038/nclimate1452>, 2012.
- 500 Crusius, J. and Wanninkhof, R.: Gas transfer velocities measured at low wind speed over a lake. *Limnol. Oceanogr.*,  
501 48, 1010-1017, <https://doi.org/10.4319/lo.2003.48.3.1010>, 2003.



- 502 Czikowsky, M.J., MacIntyre, S., Tedford, E.W., Vidal, J., and Miller, S.D.: Effects of wind and buoyancy on  
503 carbon dioxide distribution and air-water flux of a stratified temperate lake. *J. Geophys. Res. Biogeosci.*, 123,  
504 2305-2322, <https://doi.org/10.1029/2017JG004209>, 2018.
- 505 De Meester, L., Declerck, S., Stoks, R., Louette, G., Van de Meutter, F., De Bie, T., Michels, E., and Brendonck,  
506 L.: Ponds and pools as model systems in conservation biology, ecology and evolutionary biology. *Aquat. Cons.*,  
507 15, 715-725, <https://doi.org/10.1002/aqc.748>, 2005.
- 508 DelSontro, T., Boutet, L., St-Pierre, A., del Giorgio, P.A., and Prairie, Y.T.: Methane ebullition and diffusion from  
509 northern ponds and lakes regulated by the interaction between temperature and system productivity. *Limnol.*  
510 *Oceanogr.*, 61, 62-77, <https://doi.org/10.1002/lno.10335>, 2016.
- 511 DelSontro, T., Beaulieu, J.J., and Downing, J.J.: Greenhouse gas emissions from lakes and impoundments:  
512 upscaling in the face of global change. *Limnol. Oceanogr. Lett.*, 3, 64-75, <https://doi.org/10.1002/lo2.10073>,  
513 2018a.
- 514 DelSontro, T., del Giorgio, P.A., and Prairie, Y.T.: No Longer a Paradox: The Interaction Between Physical  
515 Transport and Biological Processes Explains the Spatial Distribution of Surface Water Methane Within and Across  
516 Lakes. *Ecosystems*, 21, 1073-1087, [10.1007/s10021-017-0205-1](https://doi.org/10.1007/s10021-017-0205-1), 2018b.
- 517 Emerson, J.B., Varner, R.K., Wik, M., Parks, D.H., Neumann, R.B., Johnson, J.E., Singleton, C. M., Woodcroft,  
518 B.J., Tollerson II, R., Owusu-Domney, A., Binder, M., Freitas, N. L., Crill, P.M., Saleska, S.R., Tyson, G.W., and  
519 Rich, V.I.: Diverse sediment microbiota shape methane emission temperature sensitivity in Arctic lakes. *Nat.*  
520 *Commun.*, 12, 5815, <https://doi.org/10.1038/s41467-021-25983-9>, 2021.
- 521 Grasset, Ch., Mendonça, R., Saucedo, G.V., Bastviken, D., Roland, F., and Sobek, S.: Large but variable methane  
522 production in anoxic freshwater sediment upon addition of allochthonous and autochthonous organic matter.  
523 *Limnol. Oceanogr.*, 63, 1488-1501, <https://doi.org/10.1002/lno.10786>, 2018.
- 524 Halekoh, H. and Hojsgaard, S.: A Kenward-Roger Approximation and Parametric Bootstrap Methods for Tests in  
525 Linear Mixed Models - The R Package pbrtest. *J. Stat. Soft.*, 59, 1-30, <https://doi.org/10.18637/jss.v059.i09> 2014.
- 526 Hofmann, H., Federwisch, L., and Peeters, F.: Wave-induced release of methane: littoral zones as a source of  
527 methane in lakes. *Limnol. Oceanogr.*, 55, 1990-2000, <https://doi.org/10.4319/lo.2010.55.5.1990>, 2010.
- 528 Hofmann, H.: Spatiotemporal distribution patterns of dissolved methane in lakes: How accurate are the current  
529 estimations of the diffusive flux path? *Geophys. Res. Lett.*, 40, 2779-2784, <https://doi.org/10.1002/grl.50453>,  
530 2013.
- 531 Hu, Z., Wu, S., Ji, Ch., Zou, J., Zhou, Q., and Liu, S.: A comparison of methane emissions following rice paddies  
532 conversion to crab-fish farming wetlands in southeast China. *Environ. Sci. Pollut. Res.*, 23, 1505-1515,  
533 <https://doi.org/10.1007/s11356-015-5383-9>, 2016.
- 534 Jansen, J., Thornton, B.F., Jammet, M.M., Wik, M., Cortés, A., Friborg, T., MacIntyre, S., and Crill, P.M.:  
535 Climate-sensitive controls on large spring emissions of CH<sub>4</sub> and CO<sub>2</sub> from northern lakes. *J. Geophys. Res.*,  
536 *Biogeosciences*, 124, 2379-2399, <https://doi.org/10.1029/2019JG005094>, 2019.
- 537 Jeppesen, E., Søndergaard, M., Sortkjaer, O., Mortensen, E., and Kristensen, P.: Interactions between  
538 phytoplankton zooplankton and fish in a shallow hypertrophic Lake a study of phytoplankton collapses in Lake  
539 Sobygaard, Denmark. *Hydrobiologia*, 1991, 149-164, <https://doi.org/10.1007/BF00026049>, 1990.
- 540 Kolar, V., Vlašánek, P., and Boukal, D.S.: The influence of successional stage on local odonate communities in  
541 man-made standing waters. *Ecol. Eng.*, 173, 106440, <https://doi.org/10.1016/j.ecoleng.2021.106440>, 2021.



- 542 Kopáček, J. and Hejzlar, J.: Semi-micro determination of total phosphorus in fresh waters with perchloric acid  
543 digestion. *Int. J. Environ. Anal. Chem.*, 53, 173-183, <https://doi.org/10.1080/03067319308045987>, 1993.
- 544 Kopáček, J. and Procházková, L.: Semi-Micro Determination of Ammonia in Water by the Rubazotic Acid Method.  
545 *Int. J. Environ. Anal. Chem.*, 53, 243-248, <https://doi.org/10.1080/03067319308045993>, 1993.
- 546 Kosten, S., Almeida, R.M., Barbosa, I., Mendonça, R., Muzitano, I.S., Oliveira-Junior, E.S., Vroom, R.J.E., Wang,  
547 H.J., and Barros, N.: Better assessments of greenhouse gas emissions from global fish ponds needed to adequately  
548 evaluate aquaculture footprint. *Sci. Total Environ.*, 748, 141247, <https://doi.org/10.1016/j.scitotenv.2020.141247>,  
549 2020.
- 550 Laas, A., Noges, P., Koiv, T., and Noges, T.: High-frequency metabolism study in a large and shallow temperate  
551 lake reveals seasonal switching between net autotrophy and net heterotrophy. *Hydrobiologia*, 694, 57-74,  
552 <https://doi.org/10.1007/s10750-012-1131-z>, 2012.
- 553 Loken, L.C., Crawford, J.T., Schramm, P.J., Stadler, P., Desai, A.R., and Stanley, E.H.: Large spatial and temporal  
554 variability of carbon dioxide and methane in a eutrophic lake. *J. Geophys. Res. Biogeosci.*, 124, 2248-2266  
555 <https://doi.org/10.1029/2019JG005186>, 2019.
- 556 Lüdecke, D.: “ggeffects: Tidy Data Frames of Marginal Effects from Regression Models.” *J. Open Source Soft.*,  
557 3, 772, <https://doi.org/10.21105/joss.00772>, 2018.
- 558 Lüdecke, D., Makowski, D., and Waggoner, P.: performance: Assessment of Regression Models Performance. R  
559 package version 0.4.4. <https://CRAN.R-project.org/package=performance>, 2020.
- 560 Ma, Y., Sun, L., Liu, C., Yang, X., Zhou, W., Yang, B., Schwenke, G., and Liu, D.L.: A comparison of methane  
561 and nitrous oxide emissions from inland mixed-fish and crab aquaculture ponds. *Sci. Total Environ.*, 637-638,  
562 517-523, <https://doi.org/10.1016/j.scitotenv.2018.05.040>, 2018
- 563 McAuliffe, C.: Gas Chromatographic determination of solutes by multiple phase equilibrium. *Chem. Technol.*, 1,  
564 46-51, 1971.
- 565 Miranda, L.E., Hargreaves, J.A., and Raborn, S.W.: Predicting and managing risk of unsuitable dissolved oxygen  
566 in a eutrophic lake. *Hydrobiologia*, 457, 177-185, <https://doi.org/10.1023/A:1012283603339>, 2001.
- 567 Murphy, J. and Riley, J.P.: A modified single-solution method for the determination of phosphate in natural waters.  
568 *Anal. Chim. Acta*, 27, 31-36, [https://doi.org/10.1016/S0003-2670\(00\)88444-5](https://doi.org/10.1016/S0003-2670(00)88444-5), 1962.
- 569 Natchimuthu, S., Sundgren, I., Gålfalk, M., Klemedtsson, L., Crill, P., Danielsson, Å., and Bastviken, D.: Spatio-  
570 temporal variability of lake CH<sub>4</sub> fluxes and its influence on annual whole lake emission estimates. *Limnol.*  
571 *Oceanogr.*, 61, 13-26, <https://doi.org/10.1002/lno.10222>, 2016.
- 572 Nijman, T.P.A., Lemmens, M., Lurling, M., Kosten, S., Welte, C., and Veraart, A.J.: Phosphorus control and  
573 dredging decrease methane emissions from shallow lakes. *Sci. Total Environ.*, 847, 15758,  
574 <https://doi.org/10.1016/j.scitotenv.2022.157584>, 2022.
- 575 Ortiz, D.A. and Wilkinson, G.M.: Capturing the spatial variability of algal bloom development in a shallow  
576 temperate lake. *Freshwater Biol.*, 66, 2064-2075, <https://doi.org/10.1111/fw.13814>, 2021.
- 577 Ostrovsky, I., McGinnis, D.F., Lapidus, L., and Eckert, W.: Quantifying gas ebullition with echosounder: The role  
578 of methane transport by bubbles in a medium-sized lake. *Limnol. Oceanogr. Meth.*, 6, 105-118,  
579 <https://doi.org/10.4319/lom.2008.6.105>, 2008.
- 580 Pechar, L.: Impacts of long-term changes in fishery management on the trophic level and water quality in Czech  
581 fishponds. *Fisheries Manag. Ecol.*, 7, 23-32, [10.1046/j.1365-2400.2000.00193.x](https://doi.org/10.1046/j.1365-2400.2000.00193.x), 2000.



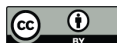

- 582 Pokorný, J. and Hauser, V.: The restoration of fish ponds in agricultural landscapes. *Ecol. Eng.*, 18, 555-574,  
583 [https://doi.org/10.1016/S0925-8574\(02\)00020-4](https://doi.org/10.1016/S0925-8574(02)00020-4), 2002.
- 584 Potužák, J., Hůda, J., and Pechar, L.: Changes in fish production effectivity in eutrophic fishponds – impact of  
585 zooplankton structure. *Aquacult. Int.*, 15, 201-210, <https://doi.org/10.1007/s10499-007-9085-2>, 2007.
- 586 Potužák, J., Duras, J., and Drozd, B.: Mass balance of fishponds: are they sources or sinks of phosphorus?  
587 *Aquacult. Int.*, 24, 1725-1745, <https://doi.org/10.1007/s10499-016-0071-4>, 2016.
- 588 Prairie, Y.T. and del Giorgio, P.A.: A new pathway of freshwater methane emissions and the putative importance  
589 of microbubbles. *Inland Waters*, 3, 311-320, <https://doi.org/10.5268/IW-3.3.542>, 2013.
- 590 Procházková, L.: Bestimmung der Nitrate im Wasser. *Zeitschrift für Analytische Chemie*, 167, 254-260, 1959.
- 591 Rasilo, T., Prairie, Y.T., and del Giorgio, P.A.: Large-scale patterns in summer diffusive CH<sub>4</sub> fluxes across boreal  
592 lakes, and contribution to diffusive C emissions. *Glob. Change Biol.*, 21, 1124-1139,  
593 <https://doi.org/10.1111/gcb.12741>, 2015.
- 594 R Core Team: A language and environment for statistical computing. R Foundation for Statistical Computing.  
595 Vienna, Austria <https://www.R-project.org/>, 2018.
- 596 Reynolds, C.S.: *Ecology of phytoplankton*, Cambridge University Press, Cambridge,  
597 <https://doi.org/10.1017/CBO9780511542145>, 2006.
- 598 Rinke, K., Huber, A.M.R., Kempke, S., Eder, M., Wolf, T., Probst, W.N., and Rothhaupt, K.: Lake-wide  
599 distributions of temperature, phytoplankton, zooplankton, and fish in the pelagic zone of a large lake. *Limnol.*  
600 *Oceanogr.*, 54, 1306-1322, <https://doi.org/10.4319/lo.2009.54.4.1306>, 2009.
- 601 Rutegwa, M., Potužák, J., Hejzlar, J., and Drozd, B.: Carbon metabolism and nutrient balance in a hypereutrophic  
602 semi-intensive fishpond. *Knowl.Manag. Aquat. Ecosyst.*, 49, <https://doi.org/10.1051/kmae/2019043>, 2019.
- 603 Sanseverino, A.M., Bastviken, D., Sundh, I., Pickova, J., and Enrich-Prast, A.: Methane carbon supports aquatic  
604 food webs to the fish level. *PLoS One*7, e42723, <https://doi.org/10.1371/journal.pone.0042723>, 2012.
- 605 Scheffer, M.: *Ecology of shallow lakes. Population and Community Biology Series*. Springer, 357 p.,  
606 <https://doi.org/10.1007/978-1-4020-3154-0>, 2004.
- 607 Schilder, J., Bastviken, D., van Hardenbroek, M., Kankaala, P., Rinta, P., Stötter, T., and Heiri, O.: Spatial  
608 heterogeneity and lake morphology affect diffusive greenhouse gas emission estimates of lakes. *Geophys. Res.*  
609 *Lett.*, 40, 5752-5756, <https://doi.org/10.1002/2013GL057669>, 2013.
- 610 Schmiedeskamp, M., Praetzel, L.S.E., Bastviken, D., and Knorr, K.H.: Whole-lake methane emissions from two  
611 temperate shallow lakes with fluctuating water levels: Relevance of spatiotemporal patterns. *Limnol. Oceanogr.*,  
612 66, 2455-2469, <https://doi.org/10.1002/lno.11764>, 2021.
- 613 Stanley, E.H., Collins, S.M., Lottig, N.R., Oliver, S.K., Webster, K.E., Cheruvilil, K.S., and Soranno, P.A.: Biases  
614 in lake water quality sampling and implications for macroscale research. *Limnol. Oceanogr.*, 64, 1572-1585,  
615 <https://doi.org/10.1002/lno.11136>, 2019.
- 616 Stockwell, J.D., Doubek, J.P., Adrian, R., Anneville, O., Carey, C.C., Carvalho, L., Domis, L.N.D.S., Dur, G.,  
617 Frassl, M.A., Grossart, H.-P., Ibelings, B.W., Lajeunesse, M.J., Lewandowska, A.M., Llamas, M.E., Matsuzaki,  
618 S.-I.S., Nodine, E.R., Nöges, P., Patil, V.P., Pomati, F., Rinke, K., Rudstam, L.G., Rusak, J.A., Salmaso, N.,  
619 Seltmann, C.T., Straile, D., Thackeray, S.J., Thiery, W., Urrutia-Cordero, P., Venail, P., Verburg, P., Woolway,  
620 R.I., Zohary, T., Andersen, M.R., Bhattacharya, R., Hejzlar, J., Janatian, N., Kpodonu, A.T.N.K., Williamson,



- 621 T.J., and Wilson, H.L.: Storm impacts on phytoplankton community dynamics in lakes. *Glob. Change Biol.*, 26,  
622 2756-2784, <https://doi.org/10.1111/gcb.15033>, 2020.
- 623 Tranvik, L.J., Downing, J.A., Cotner, J.B., Loiselle, S.A., Striegl, R.G., Ballatore, T.J., Dillon, P., Finlay, K.,  
624 Fortino, K., Knoll, L.B., Kortelainen, P.L., Kutser, T., Larsen, S., Laurion, I., Leech, D.M., McCallister, S.L.,  
625 McKnight, D.M., Melack, J.M., Overholt, E., Porter, J.A., Prairie, Y.T., Renwick, W.H., Roland, F., Sherman,  
626 B.S., Schindler, D.W., Sobek, S., Tremblay, A., Vanni, M.J., Verschoor, A.M., von Wachenfeldt, E.,  
627 Weyhenmeyer, G.A.: Lakes and reservoirs as regulators of carbon cycling and climate. *Limnol. Oceanogr.*, 54,  
628 2298-2314, [https://doi.org/10.4319/lo.2009.54.6\\_part\\_2.2298](https://doi.org/10.4319/lo.2009.54.6_part_2.2298), 2009.
- 629 van Bergen, T.J.H.M., Barros, N., Mendonça, R., Aben, R.C.H., Althuizen, I.H.J., Huszar, V., Lamers, L.P.M.,  
630 Lüring, M., Roland, F., Kosten, S.: Seasonal and diel variation in greenhouse gas emissions from an urban pond  
631 and its major drivers. *Limnol. Oceanogr.*, 64, 2129-2139, <https://doi.org/10.1002/lno.11173>, 2019.
- 632 Varadharajan, Ch. and Hemond, H.F.: Time-series analysis of high-resolution ebullition fluxes from a stratified,  
633 freshwater lake. *J. Geophys. Res.*, 117, G02004, <https://doi.org/10.1029/2011JG001866>, 2012.
- 634 Wanninkhof, R.: Relationship between wind speed and gas exchange over the ocean revisited. *Limnol. Oceanogr.*  
635 *Methods*, 12, 351-362, <https://doi.org/10.4319/lom.2014.12.351>, 2014.
- 636 Wiesenburg, D.A. and Guinasso N.L.: Equilibrium solubilities of methane, carbon monoxide, and hydrogen in  
637 water and sea water. *J. Chem. Eng. Data*, 24, 356-360, <https://doi.org/10.1021/je60083a006>, 1979.
- 638 Wik, M., Varner, R.K., Anthony, K.W., MacIntyre, S., and Bastviken, D.: Climate-sensitive northern lakes and  
639 ponds are critical components of methane release. *Nat. Geosci.*, 9, 99-105, <https://doi.org/10.1038/ngeo2578>,  
640 2016.
- 641 Xiao, Q., Zhang, M., Hu, Z., Gao, Y., Hu, Ch., Liu, Ch., Liu, S., Zhang, Z., Zhao, J., Xiao, W., and Lee, X.: Spatial  
642 variations of methane emission in a large shallow eutrophic lake in subtropical climate. *J. Geophys. Res.*  
643 *Biogeosci.*, 122, <https://doi.org/10.1002/2017JG003805>, 2017.
- 644 Yamamoto, S., Alcauskas, J.B., and Crozier, T.E. Solubility of methane in distilled water and seawater. *J. Chem.*  
645 *Eng. Data*, 21, 78-80, <https://doi.org/10.1021/je60068a029>, 1976.
- 646 Yan, X., Xu, X., Ji, M., Zhang, Z., Wang, M., Wu, S., Wang, G., Zhang, Ch., and Liu, H.: Cyanobacteria blooms:  
647 A neglected facilitator of CH<sub>4</sub> production in eutrophic lakes. *Sci. Total Environ.*, 651, 466-474,  
648 <https://doi.org/10.1016/j.scitotenv.2018.09.197>, 2019.
- 649 Yang, P., Zhang, Y., Yang, H., Zhang, Y., Xu, J., Tan, L., Tong, C., and Lai, D.Y.: Large fine-scale spatiotemporal  
650 variations of CH<sub>4</sub> diffusive fluxes from shrimp aquaculture ponds affected by organic matter supply and aeration  
651 in Southeast China. *J. Geophys. Res. Biogeosci.*, 124, 1290-1307, <https://doi.org/10.1029/2019JG005025>, 2019.
- 652 Yang, P., Zhang, Y., Yang, H., Guo, Q., Lai, D.Y.F., Zhao, G., Li, L., and Tong, C.: Ebullition was a major  
653 pathway of methane emissions from the aquaculture ponds in Southeast China. *Water Res.*, 184, 116176,  
654 <https://doi.org/10.1016/j.watres.2020.116176>, 2020.
- 655 Yuan, J., Xiang, J., Liu, D.Y., Kang, H., He, T.H., Kim, S., Lin, Y.X., Freeman, C., and Ding, W.X.: Rapid growth  
656 in greenhouse gas emissions from the adoption of industrial-scale aquaculture. *Nat. Clim. Chang.*, 9, 318-322,  
657 <https://doi.org/10.1038/s41558-019-0425-9>, 2019.
- 658 Yuan, J., Liu, D., Xiang, J., He, T., Kang, H., and Ding, W.: Methane and nitrous oxide have separated production  
659 zones and distinct emission pathways in freshwater aquaculture ponds. *Water Research*, 190, 116739,  
660 <https://doi.org/10.1016/j.watres.2020.116739>, 2021.



- 661 Zar, J.H.: Biostatistical analysis. Prentice Hall, Inc., Englewood Cliffs, New York, 663 p., 1984.
- 662 Zhang, L., Liao, Q., Gao, R., Luo, R., Liu, Ch., Zhong, J., and Wang, Z.: Spatial variations in diffusive methane  
663 fluxes and the role of eutrophication in a subtropical shallow lake. *Sci. Total Environ.*, 759, 143495,  
664 <https://doi.org/10.1016/j.scitotenv.2020.143495>, 2021.
- 665 Zhao, J., Zhang, M., Xiao, W., Jia, L., Zhang, X., Wang, J., Zhang, Z., Xie, Y., Yini Pu, Liu, S., Feng, Z., Lee X.:  
666 Large methane emission from freshwater aquaculture ponds revealed by long-term eddy covariance observation.  
667 *Agric. For. Meteorol.*, 308-309, 108600, <https://doi.org/10.1016/j.agrformet.2021.108600>, 2021.
- 668 Zhou, Y.Q., Zhou, L., Zhang, Y.L., de Souza, J.G., Podgorski, D.C., Spencer, R.G.M., Jeppesen, E., and Davidson,  
669 T.A.: Autochthonous dissolved organic matter potentially fuels methane ebullition from experimental lakes. *Water*  
670 *Res.*, 166, 115048, <https://doi.org/10.1016/j.watres.2019.115048>, 2019.
- 671 Zuur, A.F., Ieno, E.N., Walker, N.J., Saveliev, A.A., and Smith, G.M.: Mixed effects models and extensions in  
672 ecology with R. Springer, New York, USA, 574 p, <https://doi.org/10.1007/978-0-387-87458-6>, 2009.
- 673
